# Supplementary material for: Combination of Risks of BMI and Health-Related Lifestyles on Kidney Function in the Prediabetic Japanese Population: A Prospective Cohort Study
Source: MDPI journal article supplement (doi:10.3390/ijerph20075338), 2023-03-30

Supplemental File-S1. Lifestyle questionnaire.

1. Q: Are you currently using an anti-hypertensive drug?  
A: Yes/ No
2. Q: Are you currently using insulin injection or an antidiabetic (hypoglycemic) drug?  
A: Yes/ No
3. Q: Are you currently using an anti-cholesteremic agent?  
A: Yes/ No
4. Q: Have you ever been diagnosed as having a stroke (cerebral hemorrhage or infarction) by a physician, or had medical treatment?  
A: Yes/ No
5. Q: Have you ever been diagnosed as having heart disease (angina pectoris or myocardial infarction) by a physician, or had medical treatment?  
A: Yes/ No
6. Q: Have you ever been diagnosed as having chronic renal failure by a physician, or got artificial dialysis?  
A: Yes/ No
7. Q: Have you ever been diagnosed as having anaemia?  
A: Yes/ No
8. Q: Have you smoked in the last month?  
A: Yes/ No
9. Q: Have you put on weight by 10kg since your 20s?  
A: Yes/ No
10. Q: Have you exercised more than 30 minutes per 1 time, more than 2 times per week, more than 1 year?  
A: Yes/ No
11. Q: Do you walk daily or do other physical activity equal to walking more than 1 hour per day?  
A: Yes/ No
12. Q: Do you walk faster than those in same age with you?  
A: Yes/ No
13. Q: Which of the following applies when chewing meals?  
A: Chew well/ Sometimes difficult/Always difficult
14. Q: Do you eat faster than others?  
A: Fast/ Normal/ Slow
15. Q: Do you have dinner within 2 hours before going to bed more than 3 times a week?  
A: Yes/ No

16. Q: Do you take snacks or sweet drinks in addition to the three meals regularly?  
A: Yes/ No
17. Q: Do you skip breakfast more than 3 times a week?  
A: Yes/ No
18. Q: How often do you drink alcohol (such as sake, shochu, beer, whisky etc.)?  
A: Everyday / Sometimes/ None
19. Q: The day you drink, how much alcohol do you consume?  
A: Less than 180ml / 180-360ml/ 360-540ml/ More than 540ml
20. Q: Do you sleep enough?  
A: Yes/ No
21. Q: Do you want to improve your lifestyle (life habit) such as exercise or eating?  
A: I am not planning on improving/ I would like to try/ I am improving (less than 6 months)/ I am improving (more than 6 months)
22. Q: If you have any chance to get a health guidance on improving your life style(life habit), will you use it?  
A: Yes/ No

Supplemental Figure-S1. Cox Proportional Hazard Model of the combination of BMI and lifestyles and the progression in kidney damage among overall subjects.

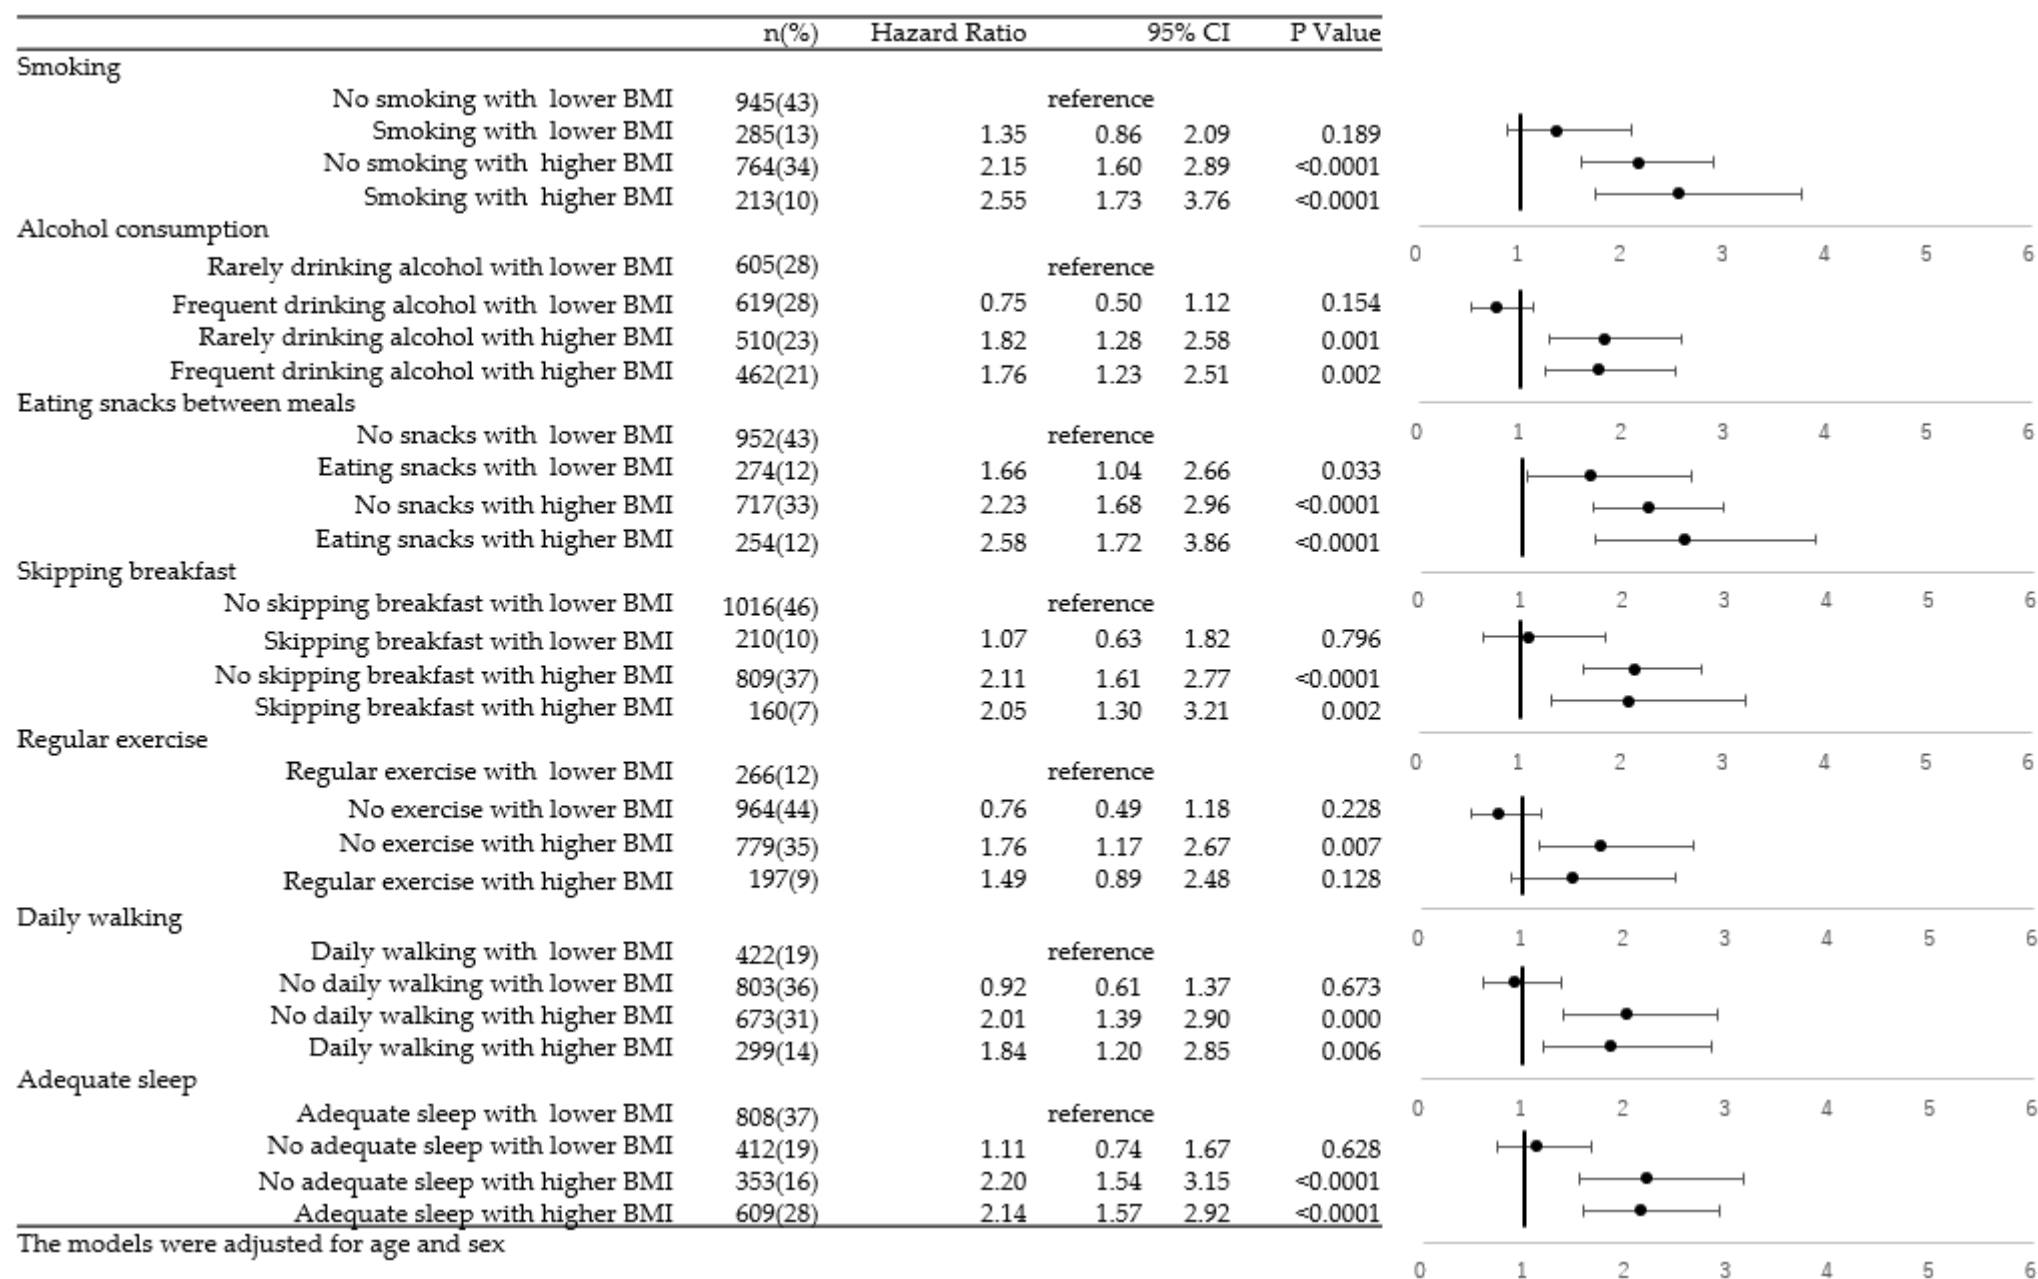

Supplemental Figure-S2. Cox Proportional Hazard Model of the combination of BMI and lifestyles and the progression in kidney damage with a definition of overweight/obese as BMI $\geq$ 25 among females.

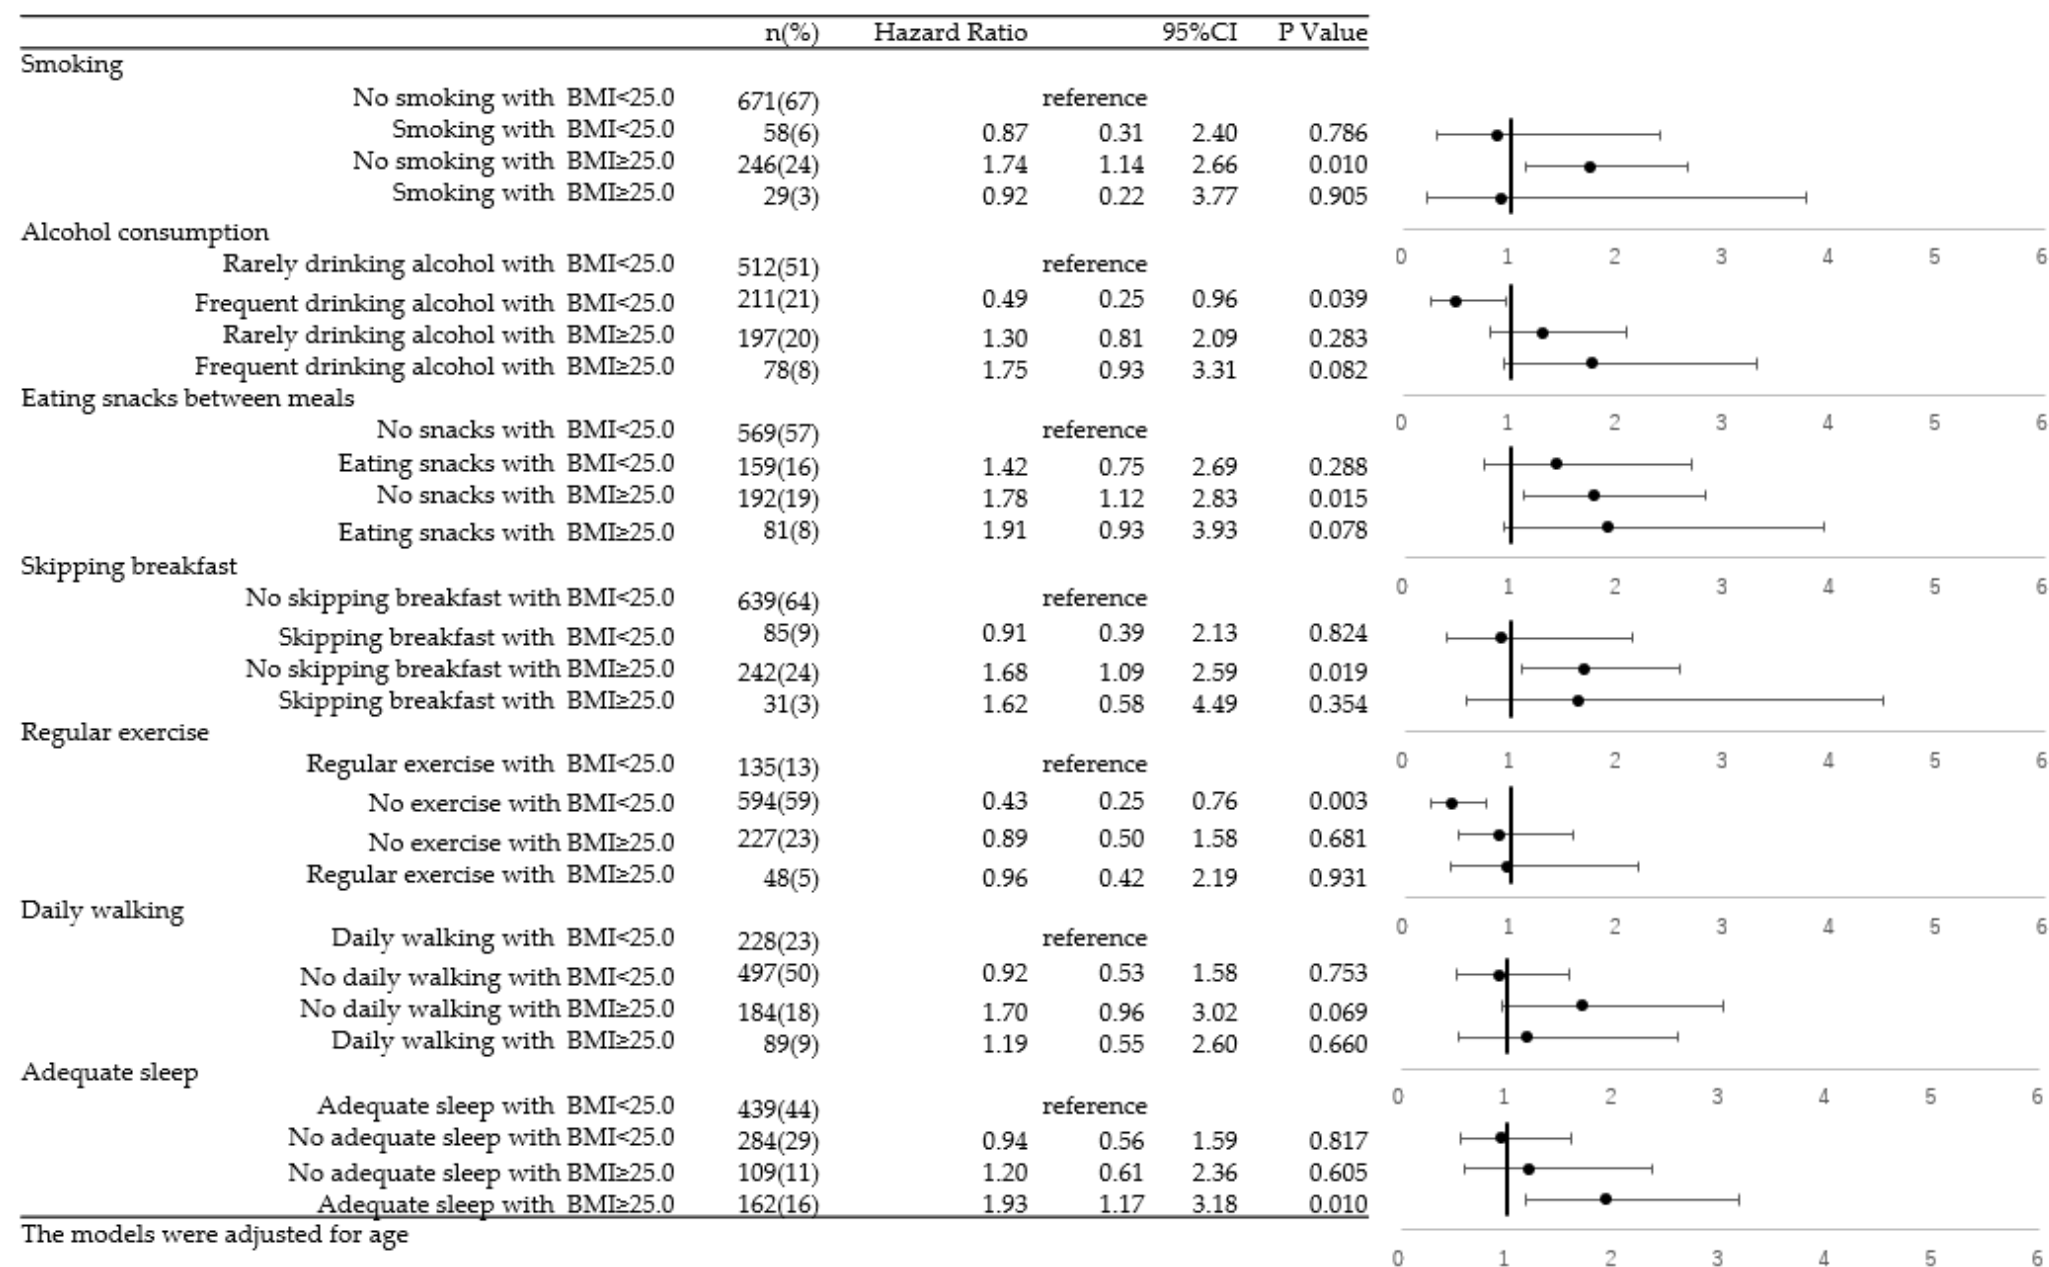

Supplement: s1 [file s1]
